# Supplementary material
Source: HighWire-hosted journal article supplement (https://bibliotheek.ehb.be/content/suppl/2022/05/16/10.3.e002801)
Supplement: bmjdrc-2022-002801supp003_data_supplement.pdf [file bmjdrc-2022-002801supp003_data_supplement.pdf]

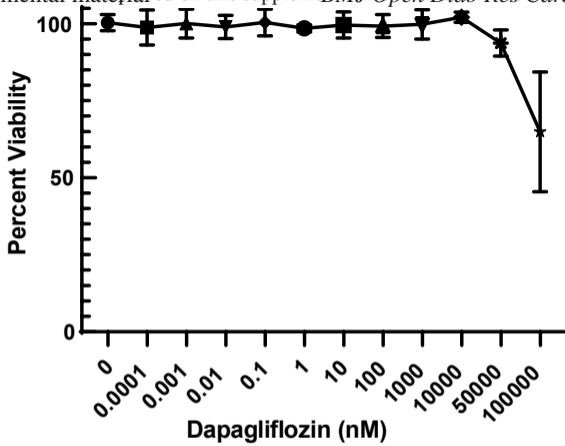

**Figure S3. Viability of HRECs after dapagliflozin treatment.** Line graph showing the percentage of viable cells after treatment with dapagliflozin (n=6-11).
